# Supplementary material
Source: publisher figshare collection journal article supplement (https://tandf.figshare.com/ndownloader/files/13610729)

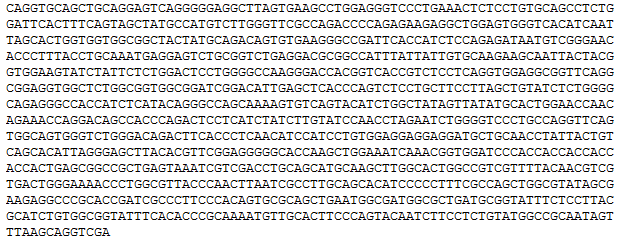


**Fig S1.** Sequence of scFv–phoA

Supplement: Supplementary file 1 [file 13610729]
